# Supplementary material
Source: Springer Nature journal article supplement (https://www.springermedizin.de/resource/supplementary/12936_2013_2978_MOESM13_ESM.pdf/9544756)

**Risk difference in malaria (ever) in ITN villages by proportion compared with malaria in control villages**

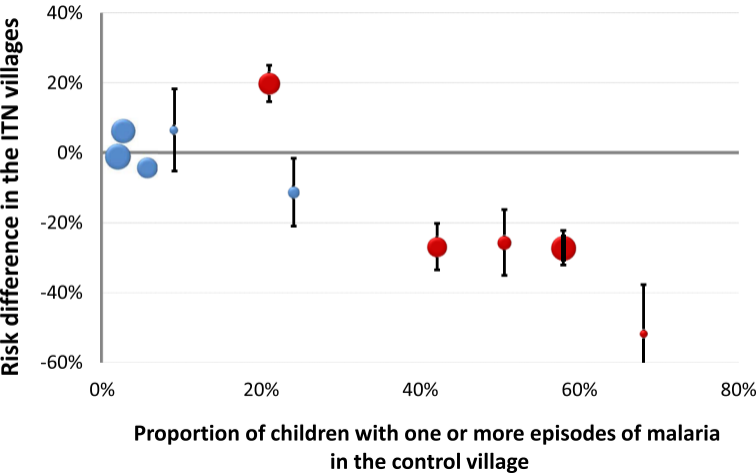

Supplement: MOESM13 [file 9544756]
